# Supplementary material
Source: PubMed Central journal article supplement (PMC10061552)
Supplement: NIHMS1879930-supplement-Supplemental_Figures.pdf [file NIHMS1879930-supplement-Supplemental_Figures.pdf]

## Supplemental Information

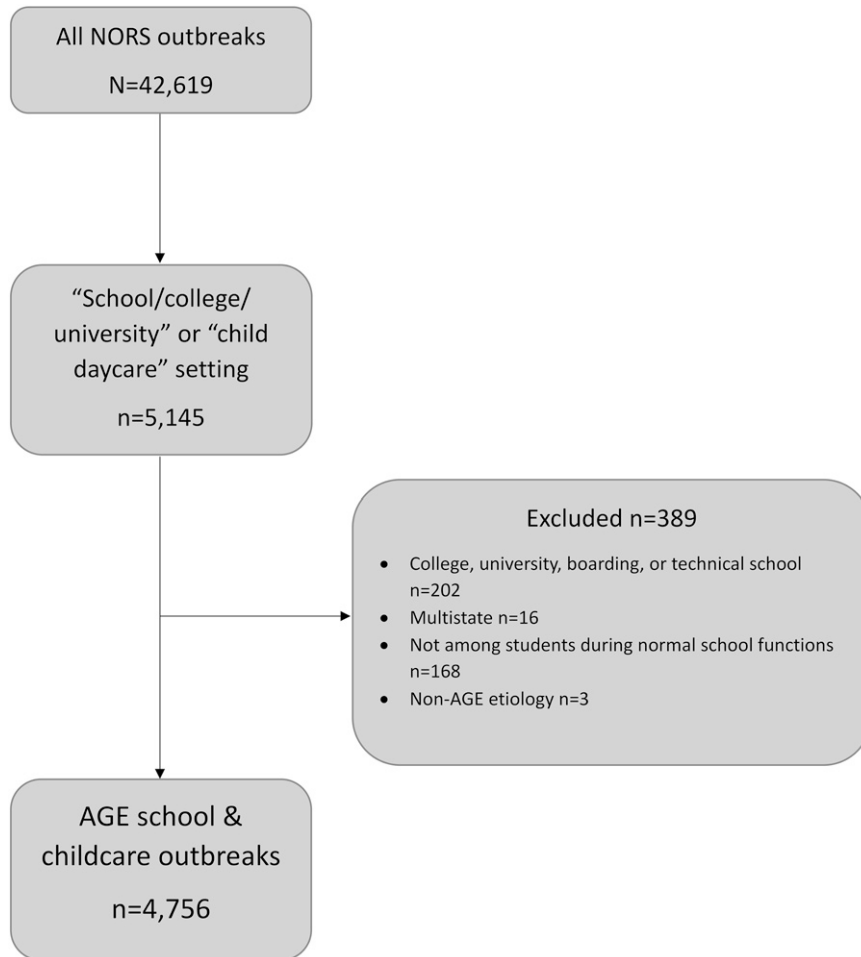

### SUPPLEMENTAL FIGURE 4

Flow chart showing the number of outbreaks initially reported through the National Outbreak Reporting System 2009–2020, outbreaks excluded by exclusion criteria, and the final number included in the analysis.

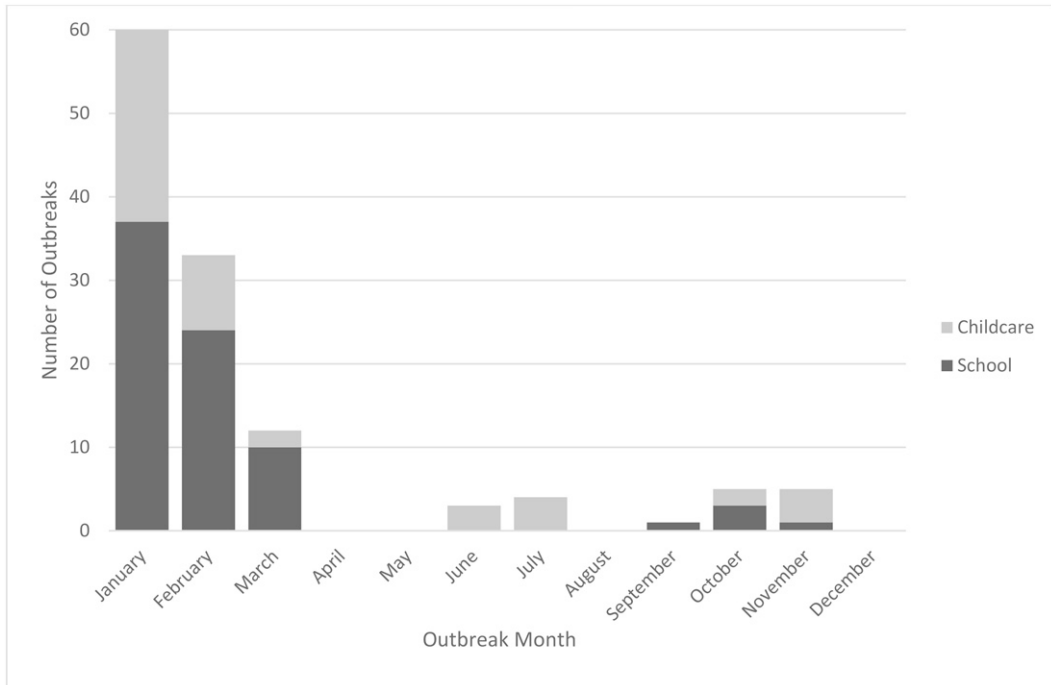

**SUPPLEMENTAL FIGURE 5**

Number of outbreaks reported by month in schools and childcares through the National Outbreak Reporting System, 2020.
